# Supplementary material for: Myostatin induces mitochondrial metabolic alteration and typical apoptosis in cancer cells
Source: PubMed Central journal article supplement — Cell Death Dis. 2013 Feb 14;4(2):e494–. doi: 10.1038/cddis.2013.31 (PMC3734823; doi:10.1038/cddis.2013.31), 2013-02-14

**Figure S1. Oxygen consumption is promoted in *mstn*<sup>-/-</sup> mice.**

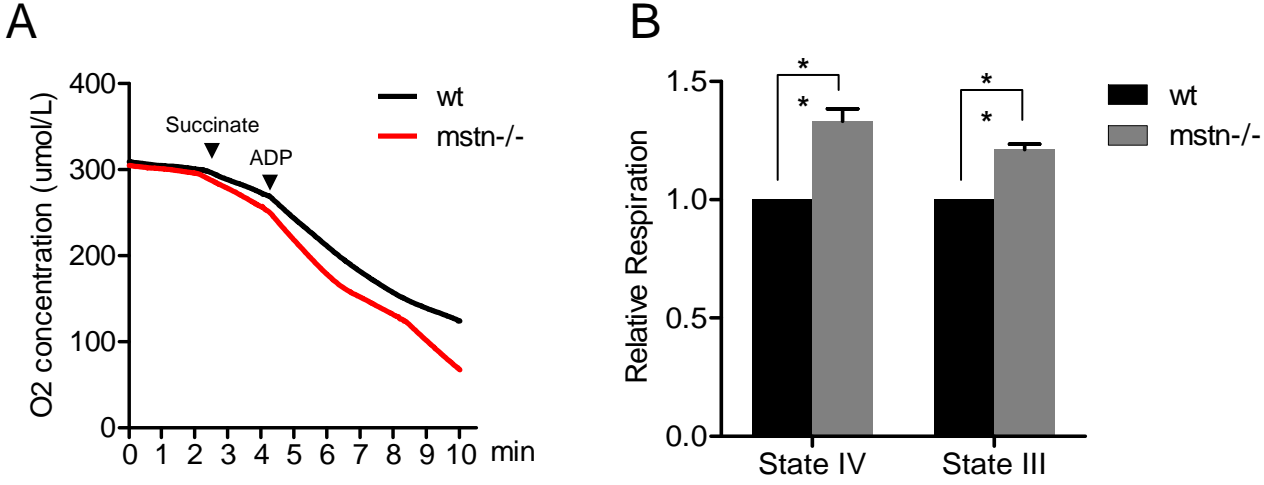

**Figure S2 Myostatin induces the decrease of mitochondrial membrane potential in cancer cells**

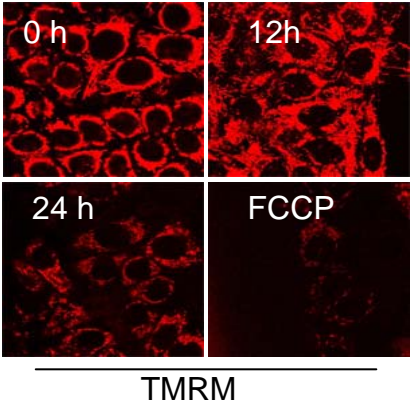

**Figure S3 Myostatin alters mitochondrial morphology of the cancer cells**

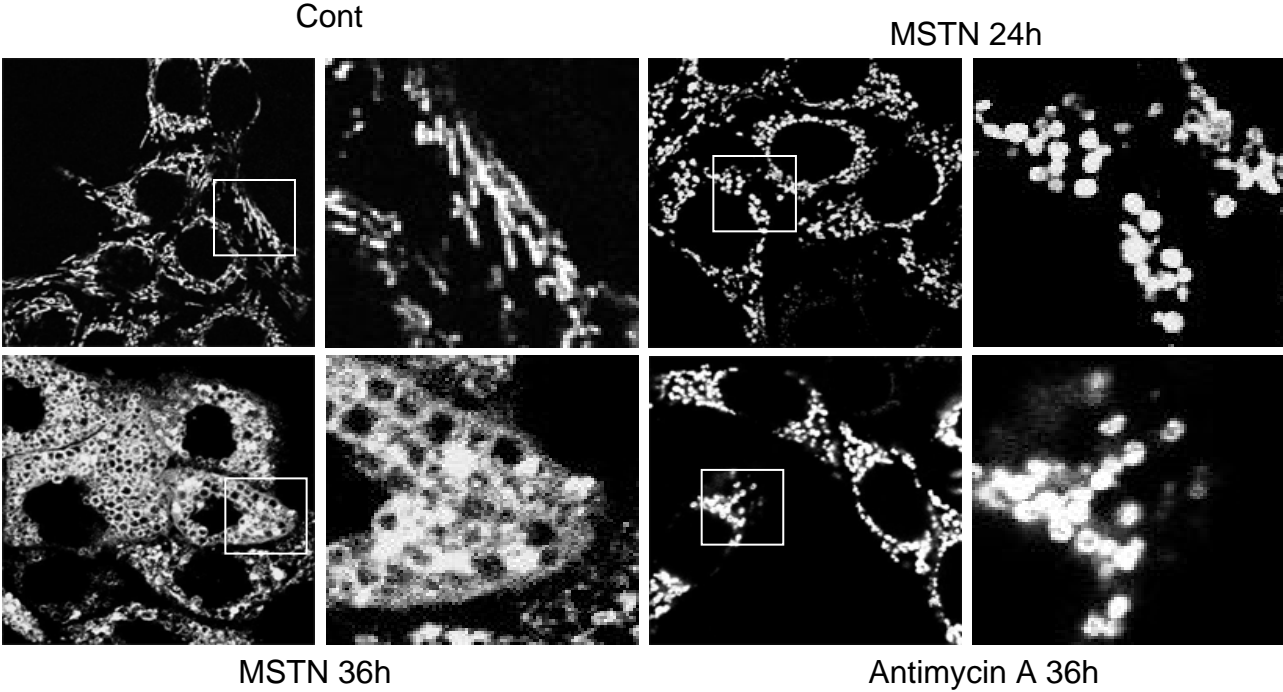

**Figure S4 TUNEL staining of tumor sections from different mice.**

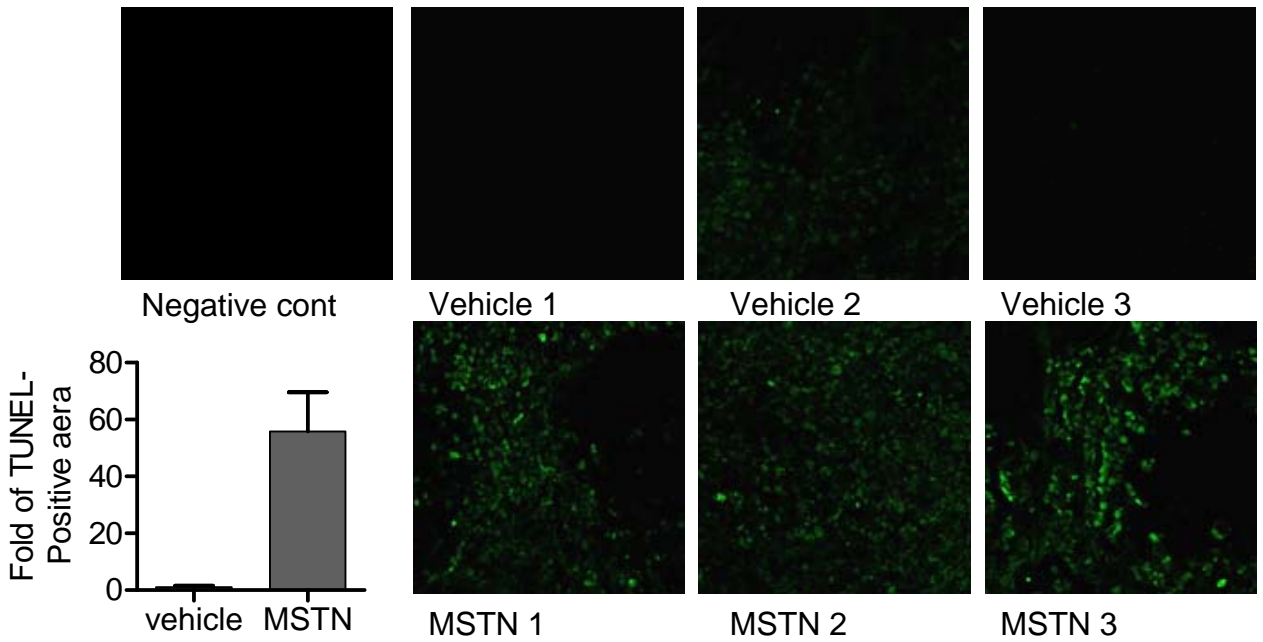

**Figure S5 Myostatin inhibit the development of B16F10-melanoma.**

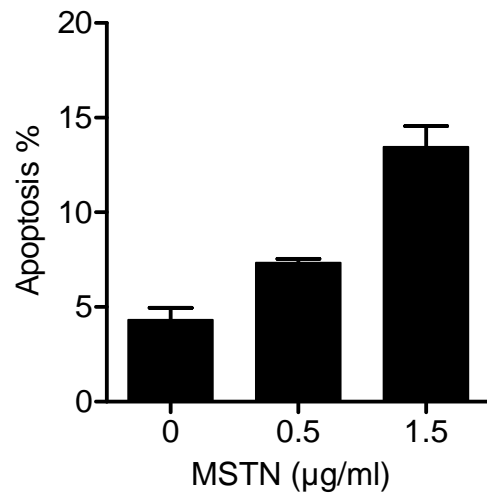

**Figure S6 Myostatin induced expression of VDAC1 was not due to either transcriptional regulation or increased de novo protein synthesis, but probably by enhancing VDAC1 stability.**

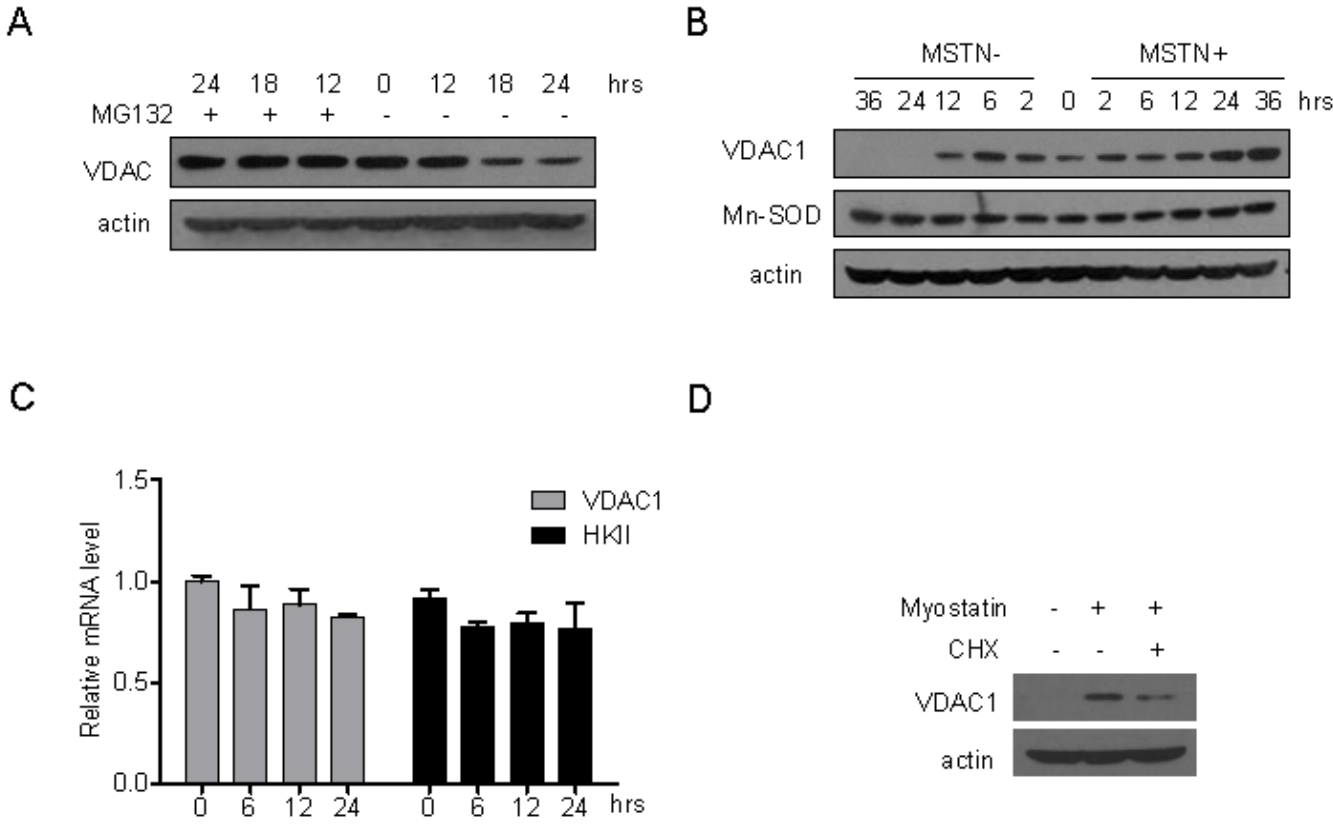

## Figure S7 Perturbation of oxidative phosphorylation results in VDAC1 upregulation

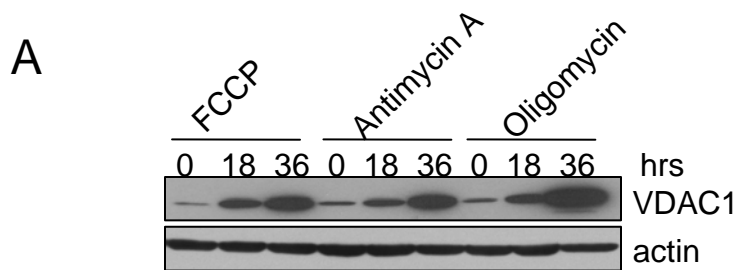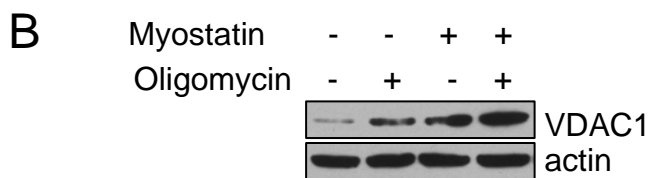

**C**

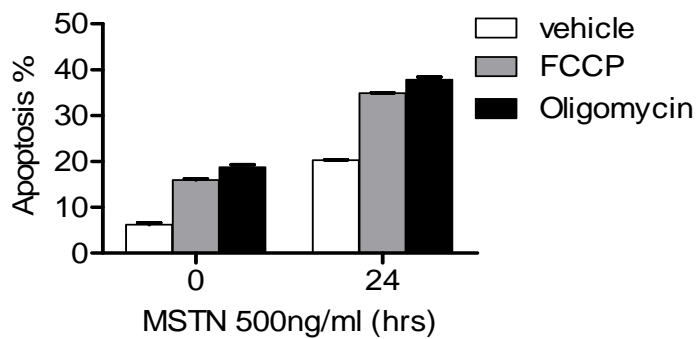

**Figure S8 The cells with Bax-deficiency or overexpression of Bcl-2 were significantly resistant to myostatin-induced apoptosis.**

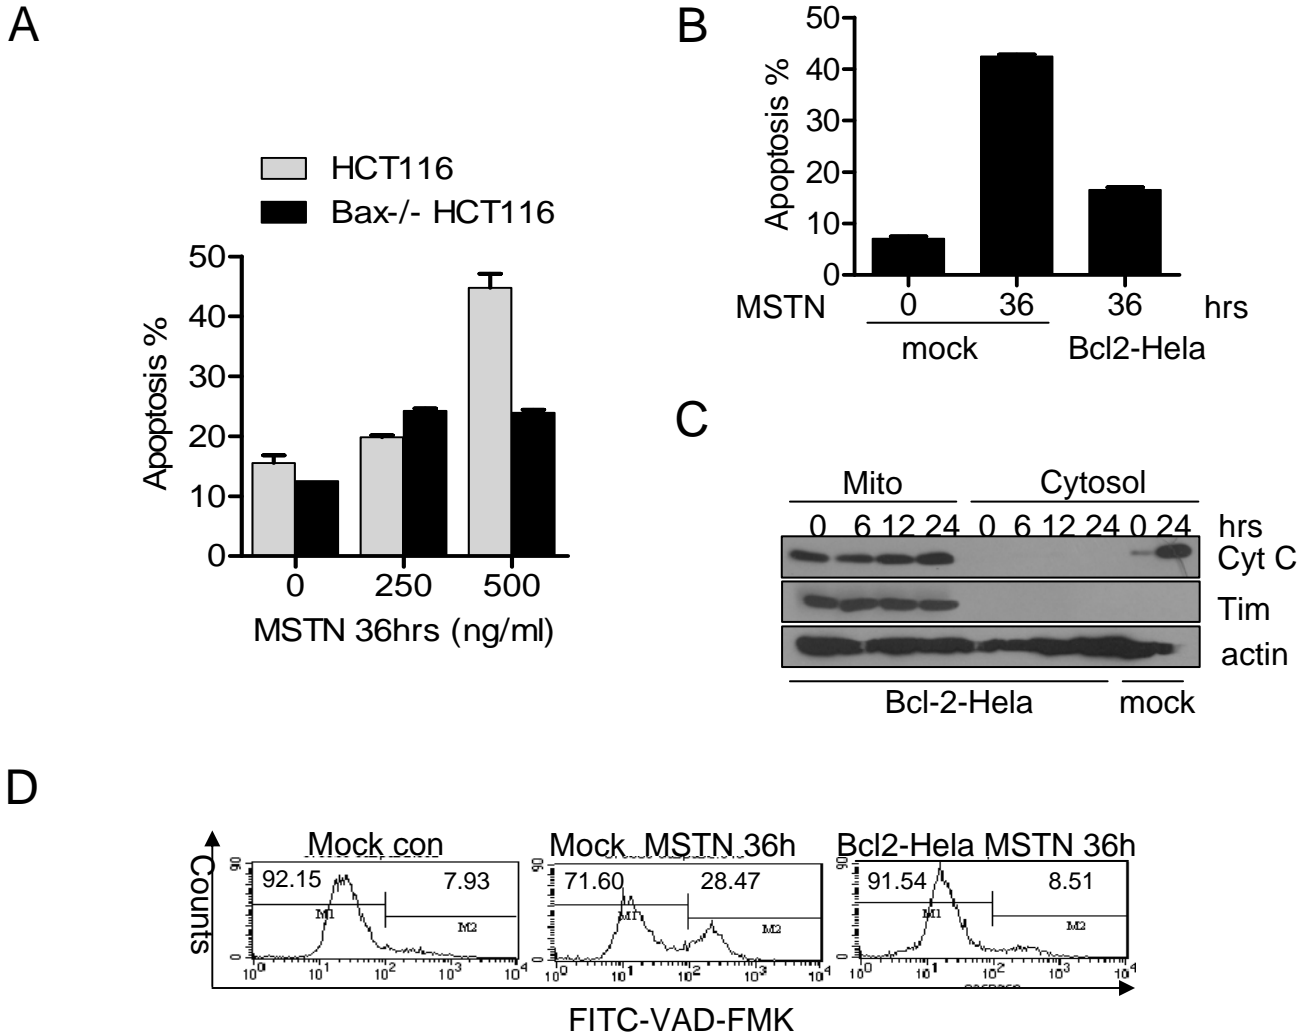



**Figure S9. CsA inhibits myostatin-induced apoptosis.**

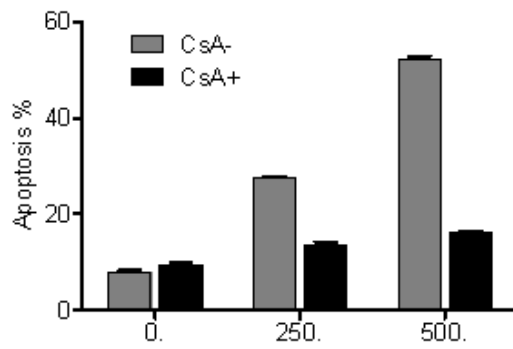

**Figure S10. Total HKII activity maintained in the same level even after 24 hours myostatin treatment, when the protein level of HKII has been decreased.**

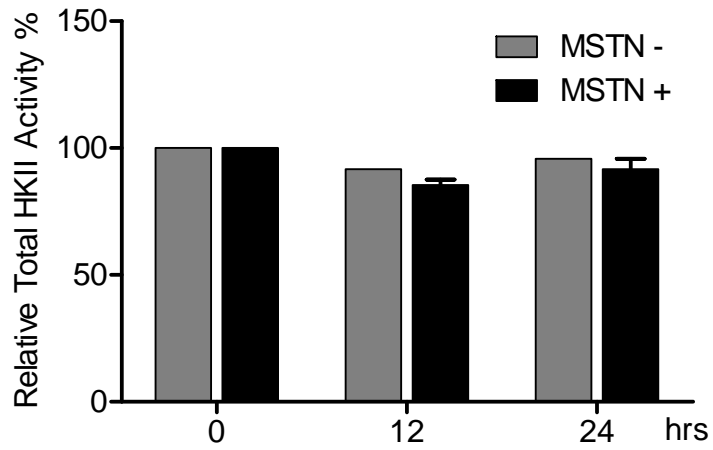

**Fig-S11 Sensitivities of different cancer cell lines to myostatin are highly correlated with their glycolytic activity.**

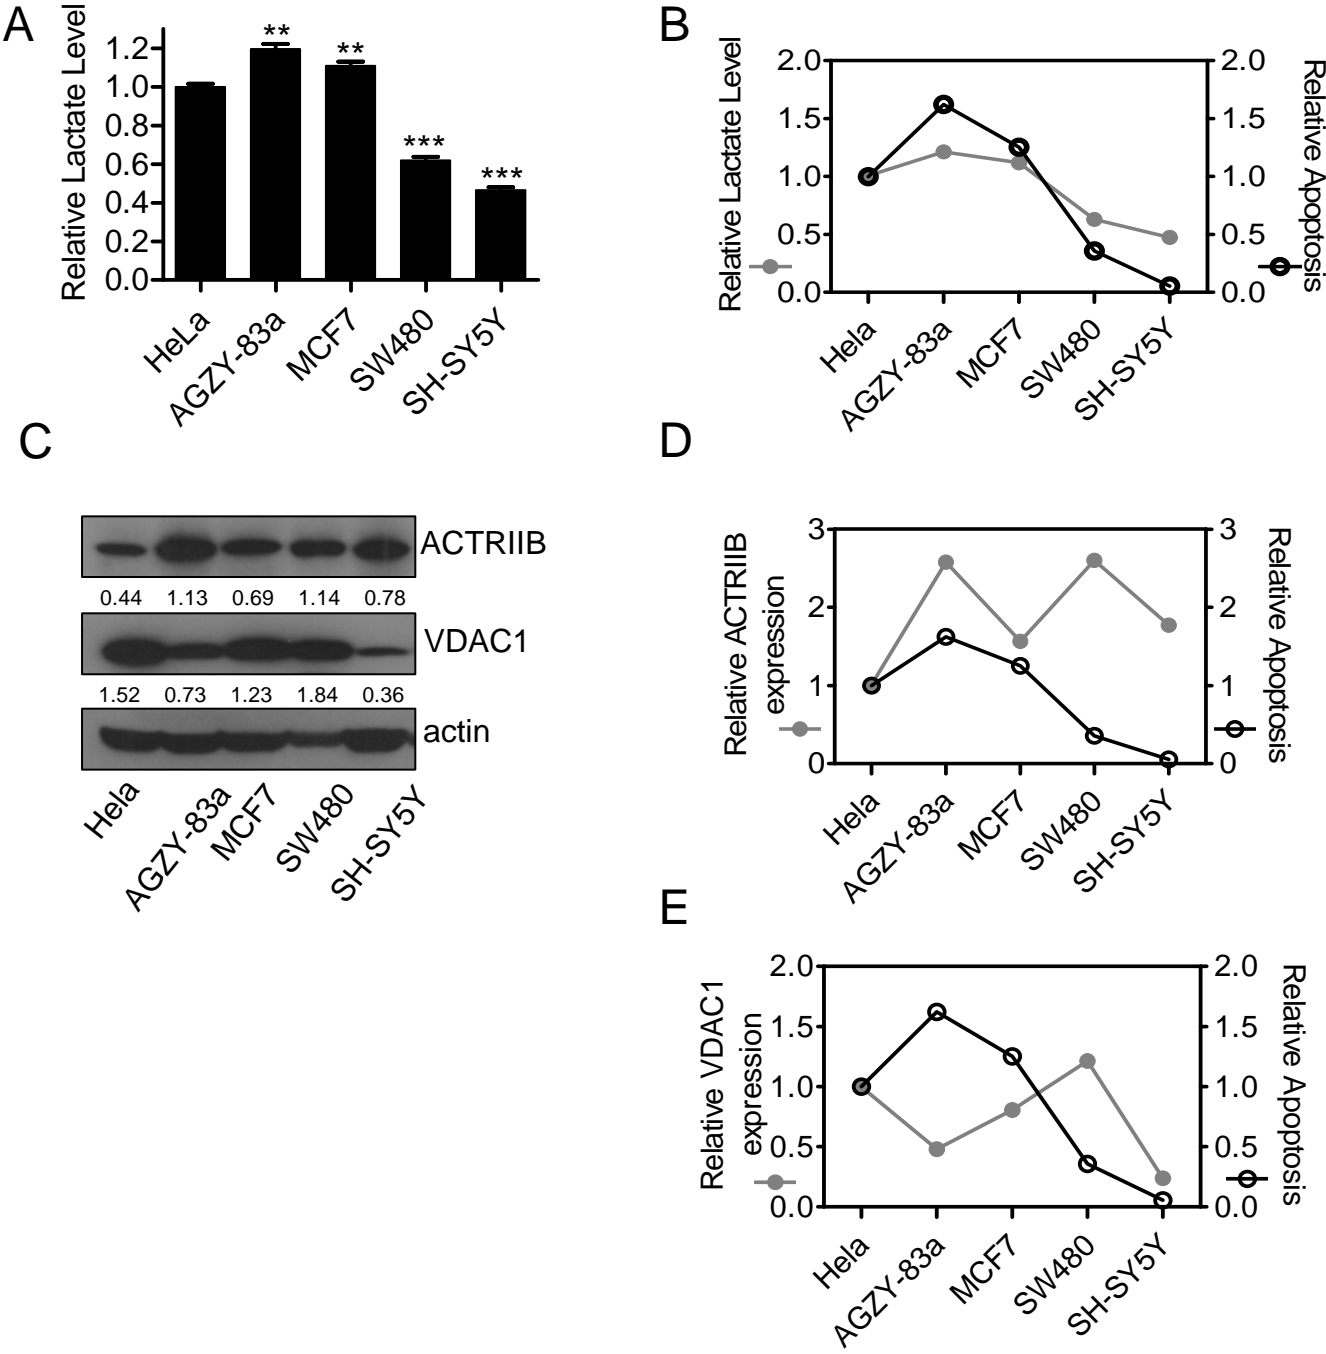

Fig-S11 Sensitivities of different cancer cell lines to myostatin are highly correlated with their glycolytic activity. (continued...)

F

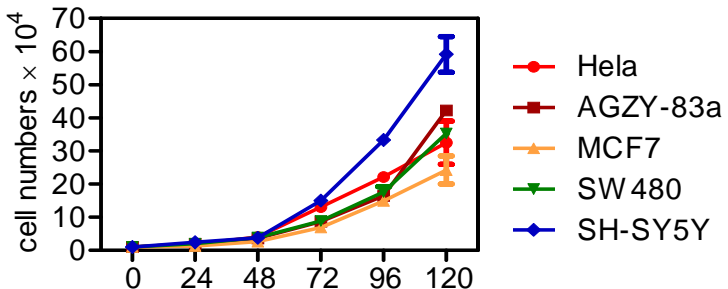

H

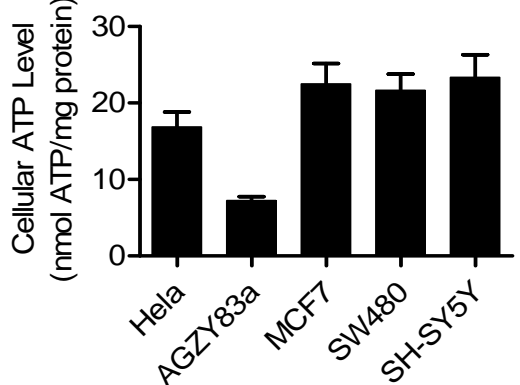

G

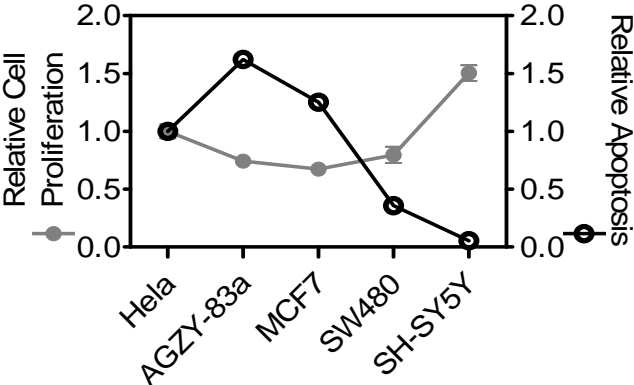

I

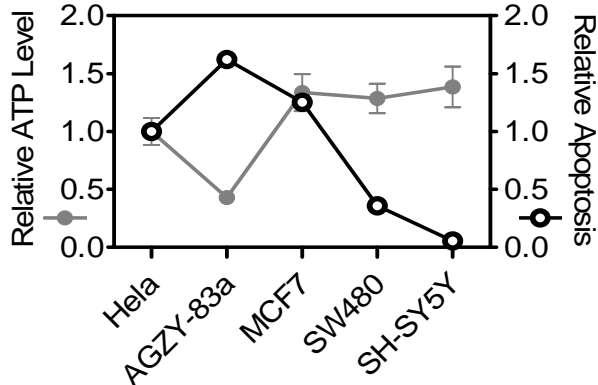

Supplement: cddis201331x1.pdf [file cddis201331x1.pdf]
